# Supplementary material for: Hatched Eggshell Membrane Can Be a Novel Source of Antioxidant Hydrolysates to Protect against H2O2-Induced Oxidative Stress in Human Chondrocytes
Source: MDPI journal article supplement (doi:10.3390/antiox11122428), 2022-12-09
Supplement: s1 [file s1]

# Supplementary Material

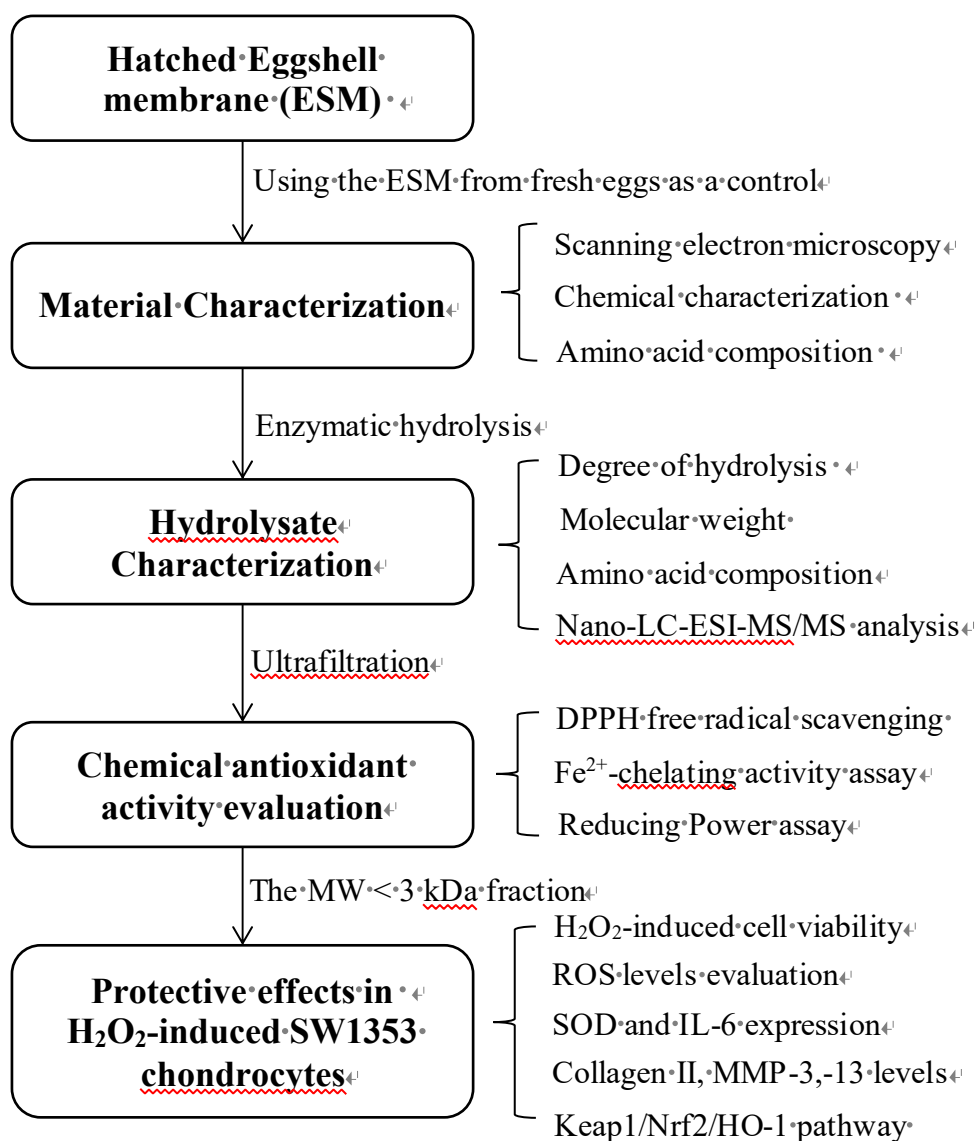

Figure S1 The flow chart of the research strategy of the present work.

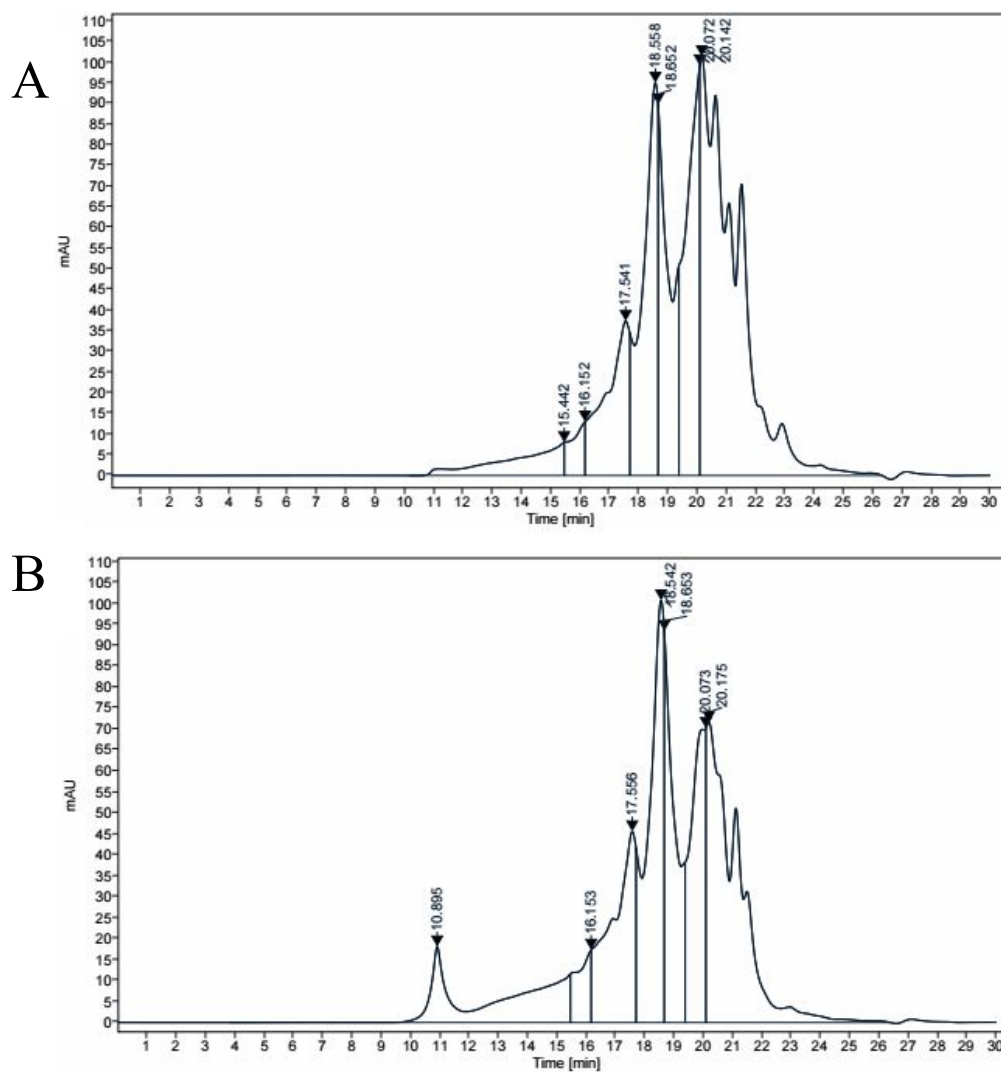

**Figure S2.** Molecular weight distribution of hatched eggshell membrane hydrolysates (A) and fresh eggshell membrane hydrolysates (B) by HPLC using a TSK gel G2000 column.

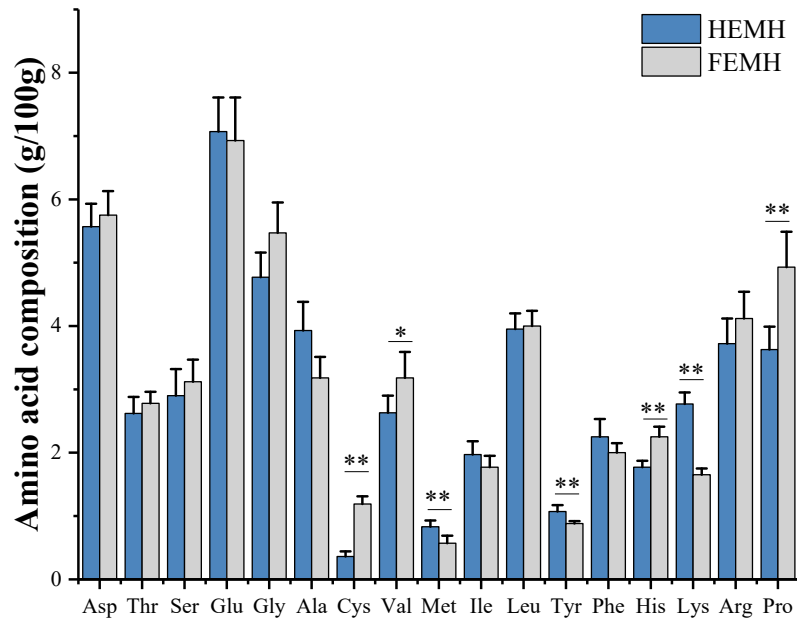

**Figure S3.** The composition of amino acids (g/100g) in hydrolysates of hatched ESM (HEMH) and fresh ESM (FEMH). The significance levels of  $*P < 0.05$  and  $**P < 0.01$  are for FEMH versus HEMH at the same amino acid.

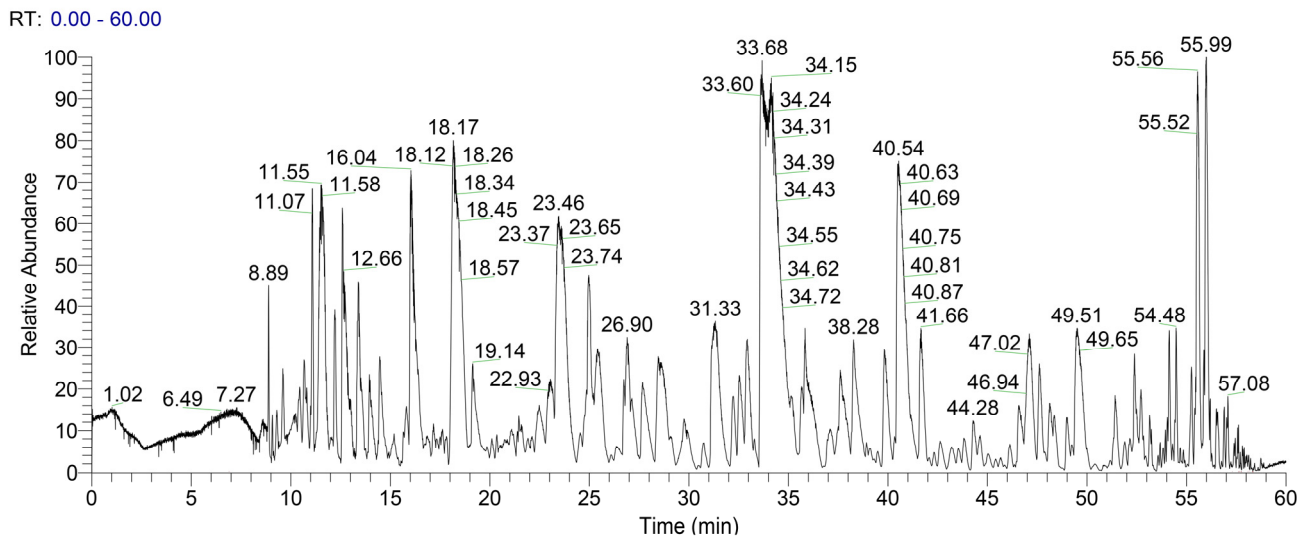

**Figure S4.** Total ion chromatogram by Nano-LC-ESI-MS/MS.

**Table S1.** The major peptides identified in HEMH by Nano-LC-ESI-MS/MS.

| Sequence        | Mass      | Protein source                    | Score  | Intensity (% of area)        | Peptide Ranker score |
|-----------------|-----------|-----------------------------------|--------|------------------------------|----------------------|
| VEDIRIR<br>PIL  | 1222.7398 | Lysyl oxidase homolog             | 119.29 | 7.70×10 <sup>9</sup> (8.58%) | 0.29                 |
| NDGRTP<br>GSR   | 958.45806 | Lysozyme C                        | 98.048 | 5.62×10 <sup>9</sup> (6.27%) | 0.30                 |
| DVPRDP<br>WVW   | 1168.5665 | Ovocleidin-116                    | 69.423 | 5.52×10 <sup>9</sup> (6.15%) | 0.84                 |
| VGIGKP<br>GPM   | 854.46841 | Collagen alpha-1(X) chain         | 73.039 | 4.84×10 <sup>9</sup> (5.40%) | 0.56                 |
| VERLRIP<br>L    | 994.62875 | Uncharacterized protein           | 110.61 | 4.24×10 <sup>9</sup> (4.72%) | 0.22                 |
| VEDIRIR<br>PI   | 1109.6557 | Lysyl oxidase homolog             | 101.28 | 3.87×10 <sup>9</sup> (4.31%) | 0.29                 |
| AYLEDR<br>PMFM  | 1271.5679 | Lysyl oxidase homolog             | 135.83 | 3.73×10 <sup>9</sup> (4.16%) | 0.77                 |
| VFFDMF<br>NAL   | 1102.5158 | Calcium-transporting<br>ATPase    | 85.265 | 3.71×10 <sup>9</sup> (4.14%) | 0.83                 |
| DKDGPF<br>RL    | 946.48723 | VWFD domain-containing<br>protein | 130.22 | 3.15×10 <sup>9</sup> (3.51%) | 0.84                 |
| AYLEDR<br>PMFML | 1384.6519 | Lysyl oxidase homolog             | 126.07 | 3.0×10 <sup>9</sup> (3.34%)  | 0.82                 |
